1 **Improved genome assembly and annotation for the rock pigeon (*Columba livia*)**

2

3 Carson Holt<sup>\*,†</sup>, Michael Campbell<sup>\*,1</sup>, David A. Keays<sup>‡</sup>, Nathaniel Edelman<sup>‡,2</sup>, Aurélie

4 Kapusta<sup>\*,†</sup>, Emily Maclary<sup>§</sup>, Eric Domyan<sup>§,\*\*</sup>, Alexander Suh<sup>††</sup>, Wesley C. Warren<sup>‡‡</sup>,

5 Mark Yandell<sup>\*,†</sup>, M. Thomas P. Gilbert<sup>§§,\*\*\*</sup>, Michael D. Shapiro<sup>§</sup>

6 \* Department of Human Genetics, University of Utah, Salt Lake City, UT, USA

7 † USTAR Center for Genetic Discovery, University of Utah, Salt Lake City, UT, USA

8 ‡ Research Institute of Molecular Pathology, Vienna, Austria

9 § Department of Biology, University of Utah, Salt Lake City, UT, USA

10 \*\* Department of Biology, Utah Valley University, Orem, UT, USA

11 †† Department of Evolutionary Biology (EBC), University of Uppsala, Uppsala, Sweden

12 ‡‡ Genome Institute at Washington University, St. Louis, MO, USA

13 §§ Natural History Museum of Denmark, University of Copenhagen, Copenhagen,

14 Denmark

15 \*\*\* Norwegian University of Science and Technology, University Museum, 7491

16 Trondheim, Norway

17 1 Current address: Division of Plant Biology, Cold Spring Harbor Laboratory, Cold

18 Spring Harbor, NY, USA

19 2 Current address: Department of Organismic and Evolutionary Biology, Harvard

20 University, Cambridge, MA, USA

21

22 **Running title:**

23 “HiRise genome assembly of rock pigeon”

24

25 **Keywords:**

26 *Columba livia*, rock pigeon, HiRise assembly, MAKER annotation

27

28 Author for Correspondence:

29 Michael D. Shapiro, Department of Biology, University of Utah, 257 S 1400 E, Salt Lake

30 City, UT 84108, [shapiro@biology.utah.edu](mailto:shapiro@biology.utah.edu), +1 801 581 5690

31

32

## ABSTRACT

33 The domestic rock pigeon (*Columba livia*) is among the most widely distributed and  
34 phenotypically diverse avian species. *C. livia* is broadly studied in ecology, genetics,  
35 physiology, behavior, and evolutionary biology, and has recently emerged as a model for  
36 understanding the molecular basis of anatomical diversity, the magnetic sense, and other  
37 key aspects of avian biology. Here we report an update to the *C. livia* genome reference  
38 assembly and gene annotation dataset. Greatly increased scaffold lengths in the updated  
39 reference assembly, along with an updated annotation set, provide improved tools for  
40 evolutionary and functional genetic studies of the pigeon, and for comparative avian  
41 genomics in general.

42

43

## INTRODUCTION

44 Intensive selective breeding of the domestic rock pigeon (*Columba livia*) has resulted in  
45 more than 350 breeds that display extreme differences in morphology and behavior (Levi  
46 1986; Domyan and Shapiro 2017). The large phenotypic differences among different  
47 breeds make them a useful model for studying the genetic basis of radical phenotypic  
48 changes, which are more typically found among different species rather than within a  
49 single species.

50

51 In genetic and genomic studies of *C. livia*, linkage analysis is important for identifying  
52 genotypes associated with specific phenotypic traits of interest (Domyan and Shapiro  
53 2017); however, short scaffold sizes in the Cliv\_1.0 draft reference assembly (Shapiro et  
54 al. 2013) hinder computationally-based comparative analyses. Short scaffolds also make

55 it more difficult to identify structural changes, such as large insertions or deletions, that  
56 are responsible for traits of interest (Domyan et al. 2014; Kronenberg et al. 2015).

57

58 Here we present the Cliv\_2.1 reference assembly and an updated gene annotation set. The  
59 new assembly greatly improves scaffold length over the previous draft reference  
60 assembly, and updated gene annotations show improved concordance with both  
61 transcriptome and protein homology evidence.

62

63

## MATERIALS & METHODS

### 64 **Genome sequencing and assembly**

65 Genomic DNA from a female Danish tumbler pigeon (full sibling of the male bird used  
66 for the original Cliv\_1.0 assembly (Shapiro et al. 2013)) was extracted from blood using  
67 a modified “salting out” protocol (Miller et al. 1988; modifications from  
68 [http://www.protocol-online.org/prot/Protocols/Extraction-of-genomic-DNA-from-whole-](http://www.protocol-online.org/prot/Protocols/Extraction-of-genomic-DNA-from-whole-blood-3171.html)  
69 [blood-3171.html](http://www.protocol-online.org/prot/Protocols/Extraction-of-genomic-DNA-from-whole-blood-3171.html), accessed 06 February 2018)). Blood was frozen immediately after  
70 collection and stored at -80°C, and purified DNA was resuspended in 10 mM Tris-HCl.  
71 The sample went through 2 freeze-thaw cycles before being used to construct the libraries  
72 described below.

73

74 Extracted DNA was used to produce long-range sequencing libraries using the “Chicago”  
75 method (Putnam et al. 2016) by Dovetail Genomics (Santa Cruz, CA). Two Chicago  
76 libraries were prepared and sequenced on the Illumina HiSeq platform to a final physical  
77 coverage (1-50 kb pairs) of 390x.

78

79 Scaffolding was performed by Dovetail Genomics using HiRise assembly software and  
80 the Cliv\_1.0 assembly as input. Briefly, Chicago reads were aligned to the input assembly  
81 to identify and mask repetitive regions, and then a likelihood model was applied to  
82 identify mis-joins and score prospective joins for scaffolding. The final assembly was  
83 then filtered for length and gaps according to NCBI submission specifications.

84

### 85 **Custom repeat library**

86 A repeat library for *C. livia* was built by combining libraries from existing avian species  
87 (Zhang et al. 2014a) together with repeats identified *de novo* for the Cliv\_2.1 assembly.  
88 *De novo* repeat identification was performed using RepeatScout (Price et al. 2005) with  
89 default parameters (>3 copies) to generate consensus repeat sequences. Identified repeats  
90 with greater than 90% sequence identity and a minimum overlap of 100 bp were  
91 assembled using Sequencher (Yokouchi et al. 1993). Repeats were classified into  
92 transposable element (TE) families using multiple lines of evidence, including homology  
93 to known elements, presence of terminal inverted repeats (TIRs), and detection of target  
94 site duplications (TSDs). Homology-based evidence was obtained using RepeatMasker  
95 (Smit et al. 1996), as well as the homology module of the TE classifying tool RepClass  
96 (Feschotte et al. 2009). RepClass was also used to identify signatures of transposable  
97 elements (TIRs, TSDs). We then eliminated non-TE repeats (simple repeats or gene  
98 families) using custom Perl scripts (available at <https://github.com/4ureliek/ReannTE>).

99

100 Our custom repeat analysis used the script ReannTE\_FilterLow.pl to label consensus  
101 sequences as simple repeats or low complexity repeats if 80% of their length could be  
102 annotated as such by RepeatMasker (the library was masked with the option -noint).  
103 Next, we used the ReannTE\_Filter-mRNA.pl script to compare consensus sequences to  
104 RefSeq (Pruitt et al. 2007) mRNAs (as of March 7th 2016) with TBLASTX (Altschul et  
105 al. 1990). Sequences were eliminated from the library when: (i) the e-value of the hit was  
106 lower than 1E-10; (ii) the consensus sequence was not annotated as a TE; and (iii) the hit  
107 was not annotated as a transposase or an unclassified protein. The script  
108 ReannTE\_MergeFasta.pl was then used to merge our library with a library combining  
109 RepeatModeler (Smit and Hubley 2008) outputs from 45 bird species (Kapusta et al.  
110 2017) and complemented with additional avian TE annotations (International Chicken  
111 Genome Sequencing 2004; Warren et al. 2010; Bao et al. 2015). Merged outputs were  
112 manually inspected to remove redundancy, and all DNA and RTE class transposable  
113 elements were removed and replaced with manually curated consensus sequences, which  
114 were either newly (DNA elements) or previously generated (RTEs) (Suh et al. 2016).

115

## 116 **Repeat landscape**

117 We used RepeatMasker software v4.0.7 (Smit et al. 2015) and our custom library to  
118 annotate the repeats in Cliv\_2.1. RepeatMasker was run with the NCBI/RMBLAST  
119 v2.6.0+ search engine (-e ncbi), the sensitive (-s) option, the -a option in order to obtain  
120 the alignment file, and without RepeatMasker default libraries. We then used the  
121 parseRM.pl script v5.7 (available at [https://github.com/4ureliek/Parsing-RepeatMasker-](https://github.com/4ureliek/Parsing-RepeatMasker-Outputs)  
122 [Outputs](https://github.com/4ureliek/Parsing-RepeatMasker-Outputs) (Kapusta et al. 2017)), on the alignment files from Repeat Masker, with the -l

123 option and a substitution rate of 0.002068 substitutions per site per million years (Zhang  
124 et al. 2014b). The script collects the percentage of divergence to the consensus for each  
125 TE fragment, after correction for higher mutation rate at CpG sites and the Kimura 2-  
126 Parameter divergence metric (provided in the alignment files from RepeatMasker).  
127 The percentage of divergence to the consensus is a proxy for age (the older the TE  
128 invasion, the more mutations will accumulate in TE fragments), to which the script  
129 applies the substitution rate in order to split TE fragments into bins of 1 My.

130

### 131 **Transcriptomics**

132 RNA was extracted from adult tissues (brain, retina, subepidermis, cochlear duct, spleen,  
133 olfactory epithelium) of the racing homer breed, and one whole embryo each of a racing  
134 homer and a parlor roller (approximately embryonic stage 25 (Hamburger and Hamilton  
135 1951)). RNA-seq libraries were prepared and sequenced using 100-bp paired-end  
136 sequencing on the Illumina HiSeq 2000 platform at the Research Institute of Molecular  
137 Pathology, Vienna (adult tissues), and the Genome Institute at Washington University, St.  
138 Louis (embryos). RNA-seq data generated for the Cliv\_1.0 annotation were also  
139 downloaded from the NCBI public repository for *de novo* re-assembly. Accession  
140 numbers for these public data are SRR521357 (Danish tumbler heart), SRR521358  
141 (Danish tumbler liver), SRR521359 (Oriental frill heart), SRR521360 (Oriental frill  
142 liver), SRR521361 (Racing homer heart), and SRR521362 (Racing homer liver).

143

144 Each FASTQ file was processed with FastQC ([http://www.bioinformatics.babraham.ac.  
145 uk/projects/fastqc/](http://www.bioinformatics.babraham.ac.uk/projects/fastqc/)) to assess quality. When FastQC reported overrepresentation of

146 Illumina adapter sequences, we trimmed these sequences with `fastx_clipper` from the  
147 FASTX-Toolkit ([http://hannonlab.cshl.edu/fastx\\_toolkit/](http://hannonlab.cshl.edu/fastx_toolkit/)). We used FASTX-Toolkit for  
148 two additional functions: runs of low quality bases at the start of reads were trimmed with  
149 `fastx_trimmer` when necessary (quality cutoff of `-Q 33`), and reads were then trimmed  
150 with `fastq_quality_trimmer` (`-Q 33`). Finally, each pair of sequence files was assembled  
151 with Trinity (Grabherr et al. 2011) version r20131110 using the `--jaccard_clip` option.

152

### 153 **Genome annotation**

154 The pre-existing reference Gnomon (Souvorov et al. 2010) derived gene models for the  
155 Cliv\_1.0 assembly (GCA\_000337935.1) were mapped onto the updated Cliv\_2.1  
156 reference assembly using direct alignment of transcript FASTA entries. This was done  
157 using the alignment workflow of the genome annotation pipeline MAKER (Cantarel et al.  
158 2008; Holt and Yandell 2011), which first seeds alignments using BLASTN (Altschul et  
159 al. 1990) and then polishes the alignments around splice sites using Exonerate (Slater and  
160 Birney 2005). Results were then filtered to remove alignments that had an overall match  
161 of less than 90% of the original model (match is calculated as percent identity multiplied  
162 by percent end-to-end coverage).

163

164 For final annotation, MAKER was allowed to identify *de novo* gene models that did not  
165 overlap the aligned Gnomon models. Protein evidence sets used by MAKER included  
166 annotated proteins from *Pterocles gutturalis* (yellow-throated sandgrouse) (Zhang et al.  
167 2014a) and *Gallus gallus* (chicken) (International Chicken Genome Sequencing 2004)  
168 together with all proteins from the UniProt/Swiss-Prot database (Bairoch and Apweiler



169 2000; UniProt 2007). The transcriptome evidence sets for MAKER included Trinity  
170 mRNA-seq assemblies from multiple *C. livia* breeds and tissues (methods for  
171 transcriptome assembly are described above). Gene predictions were produced within  
172 MAKER by Augustus (Stanke and Waack 2003; Stanke et al. 2008). Augustus was  
173 trained using 1000 Cliv\_1.0 Gnomon gene models that were split using the  
174 randomSplit.pl script into sets for training and evaluation. We followed a semi-automatic  
175 training protocol  
176 ([https://vcru.wisc.edu/simonlab/bioinformatics/programs/augustus/docs/tutorial2015/train](https://vcru.wisc.edu/simonlab/bioinformatics/programs/augustus/docs/tutorial2015/training.html)  
177 [ing.html](https://vcru.wisc.edu/simonlab/bioinformatics/programs/augustus/docs/tutorial2015/training.html), accessed 9 February 2018). Repetitive elements in the genome were identified  
178 using the custom repeat library described above.

179

#### 180 **Linkage map construction and anchoring to current assembly**

181 Genotyping by sequencing (GBS) data was generated, trimmed, and filtered as previously  
182 described (Domyan et al. 2016). Reads were mapped to the Cliv\_2.1 assembly using  
183 Bowtie2 (Langmead and Salzberg 2012). Genotypes were called using Stacks (Catchen et  
184 al. 2011), with a minimum read-depth cutoff of 10. Thresholds for automatic corrections  
185 were set using the parameters `-min_hom_seqs 10, -min_het_seqs 0.01, -max_het_seqs`  
186 `0.15`. Sequencing coverage and genotyping rate varied between individuals, and birds  
187 with genotyping rates in the bottom 25% were excluded from map assembly.

188

189 Genetic map construction was performed using R/qtl v1.41-6 ([www.rqtl.org](http://www.rqtl.org)) (Broman et  
190 al. 2003). For autosomal markers, markers showing segregation distortion (Chi-square,  $p$   
191  $< 0.01$ ) were eliminated. Sex-linked scaffolds were assembled and ordered separately,

192 due to differences in segregation pattern for the Z-chromosome. Z-linked scaffolds were  
193 identified by assessing sequence similarity and gene content between pigeon scaffolds  
194 and the Z-chromosome of the annotated chicken genome (Ensembl Gallus\_gallus-5.0).  
195  
196 Pairwise recombination fractions were calculated for all autosomal and Z-linked markers.  
197 Missing data were imputed using “fill.geno” with the method “no\_dbl\_XO”. Duplicate  
198 markers were identified and removed. Within individual scaffolds, R/qtl functions  
199 “droponemarker” and “calc.errorlod” were used to assess genotyping error. Markers were  
200 removed if dropping the marker led to an increased LOD score, or if removing a non-  
201 terminal marker led to a decrease in length of >10 cM that was not supported by physical  
202 distance. Individual genotypes were removed if they showed with error LOD scores >5  
203 (Lincoln and Lander 1992). Linkage groups were assembled from 2960 autosomal  
204 markers and 232 Z-linked markers using the parameters (max.rf 0.1, min.lod 6). In the  
205 rare instance that single scaffolds were split into multiple linkage groups, linkage groups  
206 were merged if supported by recombination fraction data; these instances typically  
207 reflected large physical gaps between markers on a single scaffold. Scaffolds in the same  
208 linkage group were manually ordered based on calculated recombination fractions and  
209 LOD scores.  
210  
211 To compare the linkage map to the original genome assembly (Cliv\_1.0), each 90-bp  
212 locus containing a genetic marker was parsed from the Stacks output file  
213 “catalogXXX\_tags.tsv” and queried to the Cliv\_1.0 assembly using BLASTN (v2.6.0+)  
214 with the parameters `-max_target_seqs 1 -max hsp 1`. 3175 of the 3192 loci (99.47%)

215 from the new assembly had a BLAST hit with an E-value  $< 4e-24$  and were retained.

216

### 217 **Assembly comparisons**

218 FASTA files from the Cliv\_2.1 and colLiv2 (Damas et al. 2017) genome assemblies were

219 hard masked using NCBI WindowMasker (Morgulis et al. 2006) and genome-wide

220 alignments were calculated with LAST (Kielbasa et al. 2011). From these alignments, a

221 genome-scale dotplot indicating syntenic regions was generated using SynMap (Lyons

222 and Freeling 2008; Lyons et al. 2008).

223

224 The colLiv2 assembly is currently unannotated. Therefore, to compare gene content

225 between assemblies, we estimated the number of annotated Cliv\_2.1 genes absent from

226 colLiv2 based on gene coordinates. Based on the length of LAST alignments, we

227 calculated the percent of each Cliv\_2.1 scaffold aligning to colLiv2. Scaffolds were

228 divided into four groups based on alignments: Cliv\_2.1 scaffolds that did not align to

229 colLiv2, Cliv\_2.1 scaffolds where LAST alignments to colLiv2 covered less than 50% of

230 the total scaffold length, Cliv\_2.1 scaffolds where LAST alignments to colLiv2 covered

231 between 50% and 75% of the total scaffold length, and Cliv\_2.1 scaffolds where LAST

232 alignments to colLiv2 covered 75% or more of the total scaffold length. For each of these

233 groups, the number of scaffolds containing genes was quantified. Many of these scaffolds

234 are small, and some may be partially or completely missing from the alignment due to

235 masking of repetitive elements. If annotated gene coordinates from Cliv\_2.1 scaffolds fell

236 partially or entirely within a region aligned to colLiv2, these genes were considered

237 “present” in colLiv2. Thus, the number of genes marked as “absent” in colLiv2 might be

238 a conservative estimate.

239

240 To compare the linkage map to colLiv2, each 90-bp locus containing a genetic marker  
241 was parsed from the Stacks output file “catalogXXX\_tags.tsv” and queried to the colLiv2  
242 assembly using BLASTN (v2.6.0+) with the parameters –max\_target\_seqs 1 –max\_hsp  
243 1.

244

#### 245 **Data availability**

246 This Whole Genome Shotgun project has been deposited at DDBJ/ENA/GenBank under  
247 the accession AKCR00000000. The version described in this paper is version  
248 AKCR02000000. The Cliv\_2.1 assembly, annotation, and associated data are available at  
249 [ftp://ftp.ncbi.nlm.nih.gov/genomes/all/GCA/000/337/935/GCA\\_000337935.2\\_Cliv\\_2.1](ftp://ftp.ncbi.nlm.nih.gov/genomes/all/GCA/000/337/935/GCA_000337935.2_Cliv_2.1).  
250 RNA-seq data are deposited in the SRA database with the BioSample accession numbers  
251 SAMN07417936-SAMN07417943, and sequence accessions SRR5878849-  
252 SRR5878856. Assembly and RNA-seq data are publicly available in NCBI databases  
253 under BioProject PRJNA167554. File S1 contains Tables S1-S7. Files S2 and S3 contain  
254 recombination fraction data used to construct Figures 5a and 5b, respectively.

255

## 256 **RESULTS AND DISCUSSION**

### 257 **Genome assembly**

258 The final Cliv\_2.1 reference assembly is 1,108,534,737 base pairs in length and consists  
259 of 15,057 scaffolds (Table 1). A total of 1,015 scaffolds contain a gene annotation.  
260 Completion analysis of the assembly using BUSCO v2 and the odb9 Vertebrata ortholog

261 dataset (Simao et al. 2015) suggests that Cliv\_2.1 is 72.9 (assembly) to 86.2%  
262 (annotation) complete. These statistics are nearly identical to the Cliv\_1.0 assembly  
263 estimate of 72.3-86.4% (Table 2); therefore, we found no significant changes in  
264 completeness between the two assemblies. Because the Chicago libraries and HiRise  
265 assembly were designed to improve scaffolding of the original assembly, not to fill gaps,  
266 we did not expect substantial improvement to assembly completeness in Cliv\_2.1.  
267 Instead, the major improvement to the Cliv\_2.1 assembly is a substantial increase in  
268 scaffold length (Fig. 1a). The N50 scaffold length for Cliv\_2.1 increased to 14.3  
269 megabases, compared to 3.15 megabases for Cliv\_1.0, a greater than 4-fold increase.  
270  
271 The new assembly joins scaffolds that, based on linkage mapping evidence (Domyan et  
272 al. 2016), we knew were physically adjacent but were still separated in Cliv\_1.0 (see  
273 Table S1 for full catalog of positions of the original assembly in the new assembly, and  
274 Table S2 for full catalog of breaks in the original assembly to form the new assembly).  
275 For example, we previously determined that Cliv\_1.0 Scaffolds 70 and 95 were joined  
276 based on genetic linkage data from a laboratory cross (Domyan et al. 2016). These two  
277 sequences are now joined into a single scaffold in the Cliv\_2.1 assembly (see Table S6  
278 for positions of genetic markers in Cliv\_1.0 and Cliv\_2.1). At least one gene model  
279 (RefSeq LOC102093126), which was previously split across two contigs, has now been  
280 unified into a single model on a single scaffold.

281

282

## 283 **Repeat landscape**

284 Using our custom library, we identified 8.04% (89.1 Mb; Table S3) of the genome  
285 assembly as repeats, which is slightly higher than the previously published estimates of  
286 7.25% (Zhang et al. 2014b) and 7.83% (Kapusta and Suh 2017). To illustrate the  
287 temporal dynamics of TE accumulation (see Methods), we split the amount of DNA of  
288 each TE class by bins of 1 million years (My) (Fig. 2). This landscape shows that TE  
289 accumulation has been consistent throughout time, with some potentially recently active  
290 elements. This includes CR1 LINEs (part of the non-LTR fraction), which are presumed  
291 to be inactive in most birds (Kapusta and Suh 2017), but comprise over 0.1 Mb of CR1  
292 copies in the youngest bin (0-1 My) in the Cliv\_2.1 assembly (Table S4).

293

## 294 **Transcriptome assemblies**

295 A total of 1,936,543 transcripts were assembled from the 14 RNA-seq data sets. Numbers  
296 of assembled transcripts from each tissue are listed in Table 3. BUSCO analysis indicated  
297 85.6% completeness of the union of transcriptome assemblies compared to the Vertebrata  
298 ortholog set.

299

## 300 **Annotation**

301 The updated annotation set contains 15,392 gene models encoding 18,966 transcripts  
302 (Table 4). This represents a minor update of the reference annotation set as 94.7% of  
303 previous models were mapped forward nearly unmodified (90% exact match for 14,898  
304 out of 15,724 previous gene models) and 494 new gene models were added to the  
305 Cliv\_2.1 annotation set (Table 5).

306

307 The updated annotation set shows a modest improvement in concordance with aligned  
308 evidence datasets from mRNA-seq and cross species protein homology evidence relative  
309 to the Cliv\_1.0 set as measured by Annotation Edit Distance (AED) (Eilbeck et al. 2009;  
310 Holt and Yandell 2011). As a result, transcript models in the Cliv\_2.1 annotation tend to  
311 have lower AED values than the Cliv\_1.0 set (Fig. 3; the cumulative distribution function  
312 (CDF) curve is shifted to the left). Lower AED values indicate greater model  
313 concordance with aligned transcriptome and protein homology data. Furthermore, the  
314 Cliv\_2.1 dataset displays greater transcript counts in every AED bin despite having  
315 slightly fewer transcripts overall compared to the Cliv\_1.0 dataset (Table S5). The higher  
316 bin counts indicate that lower AED values are not solely a result of removing  
317 unsupported models from the annotation set, but rather suggest that evidence  
318 concordance has improved overall.

319

### 320 **Linkage map**

321 The linkage map consists of 3,192 markers assembled into 48 autosomal linkage groups  
322 and a single Z-chromosome linkage group (Table S6). The map contains markers from  
323 236 scaffolds. Together, these scaffolds encompass 1,048,536,443 bp (94.6%) of the  
324 Cliv\_2.1 assembly, and include 13,026 of 15,392 (84.6%) annotated genes. Cliv\_2.1  
325 scaffolds are strongly supported by linkage data. For 235 out of 236 scaffolds included in  
326 the linkage map, all GBS markers mapped to that scaffold form a single contiguous block  
327 within one linkage group (only scaffold ScoHet5\_252 was split between two linkage

328 groups). Additionally, within-scaffold marker order was largely supported by calculated  
329 pairwise recombination fractions.

330

### 331 **Comparison with colLiv2 genome assembly**

332 Recently, Damas et al. (2017) used computational methods and universal avian bacterial  
333 artificial chromosome (BAC) probes to achieve chromosome-level scaffolding using the  
334 Cliv\_1.0 assembly as input material. This assembly, named colLiv2 (GenBank assembly  
335 accession GCA\_001887795.1; 1,018,016,946 bp in length), is approximately 8% smaller  
336 than the Cliv\_2.1 assembly.

337

338 Based on genome-wide pairwise alignments using LAST (Fig. 4) (Kielbasa et al. 2011), a  
339 substantial number of regions of Cliv\_2.1 that do not align to colLiv2 genome contain  
340 both unique sequence and annotated genes. Based on gene coordinates, 1184 annotated  
341 Cliv\_2.1 genes were absent from colLiv2 (Table 6).

342

343 Of the 3,192 GBS makers mapped to Cliv\_2.1, 2,940 markers (92.1%) mapped to  
344 colLiv2 with an E-value  $<4e-24$ . Of the remaining markers, 7 mapped to colLiv2 with an  
345 E-value  $>4e-24$ , and 245 markers (7.67%) failed to map to colLiv2 entirely. We assessed  
346 the agreement between marker and linkage data by calculating pairwise recombination  
347 fractions for the 2940 markers, then plotted these recombination fractions in the order in  
348 which markers appear on the colLiv2 chromosome-level scaffolds. Overall, the marker  
349 order largely agrees with calculated recombination fractions; however, we identified a  
350 number of locations where pairwise recombination fractions suggest that portions of the



351 colLiv2 chromosomes are not ordered properly, as exemplified in Fig. 5. We also  
352 identified 42 markers for which the location with the best sequence match in colLiv2  
353 appears to be incorrect based on recombination fraction estimates; these markers are  
354 summarized in Table S7.

355

## 356 **Conclusions**

357 The improved scaffold lengths and updated gene model annotations of Cliv\_2.1 will  
358 further empower ongoing studies to identify genes responsible for phenotypic traits of  
359 interest. In addition, longer scaffolds will improve detection of regions under selection,  
360 including large deletions and other structural variants responsible for interesting traits in  
361 *C. livia*. Finally, our new transcriptomic data provide tissue-specific expression profiles  
362 for several adult tissue types and an important embryonic stage for the morphogenesis of  
363 limbs, craniofacial structures, skin, and other tissues.

364

## 365 **ACKNOWLEDGEMENTS**

366 We thank Dovetail Genomics for their aid in scaffolding the assembly; Julia Carleton and  
367 Anna Vickrey for technical support; and Elena Boer for comments on the manuscript.

368 This work was supported by National Science Foundation grant DEB1149160 and  
369 National Institutes of Health (NIH) grant R01GM115996 to MDS; NSF EAGER grant  
370 IOS1561337 to MY; a European Research Council starting grant 336724 and Austrian  
371 Science Fund (FWF) grant Y726 to DAK; and European Research Council Consolidator  
372 grant 681396 to MTPG. We gratefully acknowledge research support from Boehringer

373 Ingelheim at the Research Institute of Molecular Pathology, and support and resources  
374 from the Center for High Performance Computing at the University of Utah.

375

376

377

## REFERENCES

- 378 Altschul, S. F., W. Gish, W. Miller, E. W. Meyers, and D. J. Lipman. 1990. Basic Local  
379 Alignment Search Tool. *Journal of Molecular Biology* 215:403-410.
- 380 Bairoch, A. and R. Apweiler. 2000. The SWISS-PROT protein sequence database and  
381 its supplement TrEMBL in 2000. *Nucl. Acids Res.* 28:45-48.
- 382 Bao, W., K. K. Kojima, and O. Kohany. 2015. Repbase Update, a database of repetitive  
383 elements in eukaryotic genomes. *Mob DNA* 6:11.
- 384 Broman, K., H. Wu, S. Sen, and G. Churchill. 2003. R/qtl: QTL mapping in  
385 experimental crosses. *Bioinformatics* 19:889-890.
- 386 Cantarel, B. L., I. Korf, S. M. C. Robb, G. Parra, E. Ross, B. Moore, C. Holt, A. Sanchez  
387 Alvarado, and M. Yandell. 2008. MAKER: An easy-to-use annotation pipeline  
388 designed for emerging model organism genomes. *Genome Res.* 18:188-196.
- 389 Catchen, J. M., A. Amores, P. Hohenlohe, W. Cresko, and J. H. Postlethwait. 2011.  
390 Stacks: building and genotyping loci de novo from short-read sequences. *G3*  
391 1:171-182.
- 392 Damas, J., R. O'Connor, M. Farre, V. P. E. Lenis, H. J. Martell, A. Mandawala, K. Fowler,  
393 S. Joseph, M. T. Swain, D. K. Griffin, and D. M. Larkin. 2017. Upgrading short-  
394 read animal genome assemblies to chromosome level using comparative  
395 genomics and a universal probe set. *Genome Res* 27:875-884.
- 396 Domyan, E. T., M. W. Guernsey, Z. Kronenberg, S. Krishnan, R. E. Boissy, A. I. Vickrey,  
397 C. Rodgers, P. Cassidy, S. A. Leachman, J. W. Fondon, 3rd, M. Yandell, and M. D.  
398 Shapiro. 2014. Epistatic and combinatorial effects of pigmentary gene  
399 mutations in the domestic pigeon. *Curr Biol* 24:459-464.
- 400 Domyan, E. T., Z. Kronenberg, C. R. Infante, A. I. Vickrey, S. A. Stringham, R. Bruders,  
401 M. W. Guernsey, S. Park, J. Payne, R. B. Beckstead, G. Kardon, D. B. Menke, M.  
402 Yandell, and M. D. Shapiro. 2016. Molecular shifts in limb identity underlie  
403 development of feathered feet in two domestic avian species. *eLife* 5:e12115.
- 404 Domyan, E. T. and M. D. Shapiro. 2017. Pigeonetics takes flight: Evolution,  
405 development, and genetics of intraspecific variation. *Dev Biol* 427:241-250.
- 406 Eilbeck, K., B. Moore, C. Holt, and M. Yandell. 2009. Quantitative measures for the  
407 management and comparison of annotated genomes. *BMC Bioinformatics*  
408 10:67.
- 409 Feschotte, C., U. Keswani, N. Ranganathan, M. L. Guibotsy, and D. Levine. 2009.  
410 Exploring repetitive DNA landscapes using REPCLASS, a tool that automates  
411 the classification of transposable elements in eukaryotic genomes. *Genome*  
412 *Biol Evol* 1:205-220.

- 413 Grabherr, M. G., B. J. Haas, M. Yassour, J. Z. Levin, D. A. Thompson, I. Amit, X. Adiconis,  
414 L. Fan, R. Raychowdhury, Q. Zeng, Z. Chen, E. Mauceli, N. Hacohen, A. Gnirke,  
415 N. Rhind, F. di Palma, B. W. Birren, C. Nusbaum, K. Lindblad-Toh, N. Friedman,  
416 and A. Regev. 2011. Full-length transcriptome assembly from RNA-Seq data  
417 without a reference genome. *Nature biotechnology* 29:644-652.
- 418 Hamburger, V. and H. L. Hamilton. 1951. A series of normal stages in the  
419 development of the chick embryo. *Journal of Morphology* 88:49-92.
- 420 Holt, C. and M. Yandell. 2011. MAKER2: an annotation pipeline and genome-  
421 database management tool for second-generation genome projects. *BMC*  
422 *Bioinformatics* 12:491.
- 423 International Chicken Genome Sequencing, C. 2004. Sequence and comparative  
424 analysis of the chicken genome provide unique perspectives on vertebrate  
425 evolution. *Nature* 432:695-716.
- 426 Kapusta, A. and A. Suh. 2017. Evolution of bird genomes-a transposon's-eye view.  
427 *Ann N Y Acad Sci* 1389:164-185.
- 428 Kapusta, A., A. Suh, and C. Feschotte. 2017. Dynamics of genome size evolution in  
429 birds and mammals. *Proc Natl Acad Sci U S A* 114:E1460-E1469.
- 430 Kielbasa, S. M., R. Wan, K. Sato, P. Horton, and M. C. Frith. 2011. Adaptive seeds tame  
431 genomic sequence comparison. *Genome Res* 21:487-493.
- 432 Kronenberg, Z. N., E. J. Osborne, K. R. Cone, B. J. Kennedy, E. T. Domyan, M. D.  
433 Shapiro, N. C. Elde, and M. Yandell. 2015. Wham: Identifying Structural  
434 Variants of Biological Consequence. *PLoS Comput Biol* 11:e1004572.
- 435 Langmead, B. and S. L. Salzberg. 2012. Fast gapped-read alignment with Bowtie 2.  
436 *Nat Methods* 9:357-359.
- 437 Levi, W. M. 1986. *The Pigeon (Second Revised Edition)*. Levi Publishing Co., Inc.,  
438 Sumter, S.C.
- 439 Lincoln, S. E. and E. S. Lander. 1992. Systematic detection of errors in genetic linkage  
440 data. *Genomics* 14:604-610.
- 441 Lyons, E. and M. Freeling. 2008. How to usefully compare homologous plant genes  
442 and chromosomes as DNA sequences. *Plant J* 53:661-673.
- 443 Lyons, E., B. Pedersen, J. Kane, M. Alam, R. Ming, H. Tang, X. Wang, J. Bowers, A.  
444 Paterson, D. Lisch, and M. Freeling. 2008. Finding and comparing syntenic  
445 regions among Arabidopsis and the outgroups papaya, poplar, and grape:  
446 CoGe with rosids. *Plant physiology* 148:1772-1781.
- 447 Miller, S. A., D. D. Dykes, and H. F. Polesky. 1988. A simple salting out procedure for  
448 extracting DNA from human nucleated cells. *Nucleic Acids Res* 16:1215.
- 449 Morgulis, A., E. M. Gertz, A. A. Schaffer, and R. Agarwala. 2006. WindowMasker:  
450 window-based masker for sequenced genomes. *Bioinformatics* 22:134-141.
- 451 Price, A. L., N. C. Jones, and P. A. Pevzner. 2005. De novo identification of repeat  
452 families in large genomes. *Bioinformatics* 21 Suppl 1:i351-358.
- 453 Pruitt, K. D., T. Tatusova, and D. R. Maglott. 2007. NCBI reference sequences  
454 (RefSeq): a curated non-redundant sequence database of genomes,  
455 transcripts and proteins. *Nucleic Acids Res*:D61 - 65.
- 456 Putnam, N. H., B. L. O'Connell, J. C. Stites, B. J. Rice, M. Blanchette, R. Calef, C. J. Troll,  
457 A. Fields, P. D. Hartley, C. W. Sugnet, D. Haussler, D. S. Rokhsar, and R. E.

- 458 Green. 2016. Chromosome-scale shotgun assembly using an in vitro method  
459 for long-range linkage. *Genome Res* 26:342-350.
- 460 Shapiro, M. D., Z. Kronenberg, C. Li, E. T. Domyan, H. Pan, M. Campbell, H. Tan, C. D.  
461 Huff, H. Hu, A. I. Vickrey, S. C. Nielsen, S. A. Stringham, H. Hu, E. Willerslev, M.  
462 T. Gilbert, M. Yandell, G. Zhang, and J. Wang. 2013. Genomic diversity and  
463 evolution of the head crest in the rock pigeon. *Science* 339:1063-1067.
- 464 Simao, F. A., R. M. Waterhouse, P. Ioannidis, E. V. Kriventseva, and E. M. Zdobnov.  
465 2015. BUSCO: assessing genome assembly and annotation completeness with  
466 single-copy orthologs. *Bioinformatics* 31:3210-3212.
- 467 Slater, G. and E. Birney. 2005. Automated generation of heuristics for biological  
468 sequence comparison. *BMC Bioinformatics* 6:31.
- 469 Smit, A. F. and R. Hubley. 2008. RepeatModeler Open-1.0  
470 <http://www.repeatmasker.org/>.
- 471 Smit, A. F., R. Hubley, and P. Green. 1996. RepeatMasker Open-3.0  
472 <http://www.repeatmasker.org/>.
- 473 Smit, A. F., R. Hubley, and P. Green. 2015. RepeatMasker Open-4.0.2013-2015  
474 <http://www.repeatmasker.org/>.
- 475 Souvorov, A., Y. Kapustin, B. Kiryutin, V. Chetvernin, T. Tatusova, and D. Lipman.  
476 2010. Gnomon – NCBI eukaryotic gene prediction tool. NCBI.
- 477 Stanke, M., M. Diekhans, R. Baertsch, and D. Haussler. 2008. Using native and  
478 syntenically mapped cDNA alignments to improve de novo gene finding.  
479 *Bioinformatics* 24:637-644.
- 480 Stanke, M. and S. Waack. 2003. Gene prediction with a hidden Markov model and a  
481 new intron submodel. *Bioinformatics* 19:ii215-225.
- 482 Suh, A., C. C. Witt, J. Menger, K. R. Sadanandan, L. Podsiadlowski, M. Gerth, A.  
483 Weigert, J. A. McGuire, J. Mudge, S. V. Edwards, and F. E. Rheindt. 2016.  
484 Ancient horizontal transfers of retrotransposons between birds and  
485 ancestors of human pathogenic nematodes. *Nature communications* 7:11396.
- 486 UniProt, C. 2007. The Universal Protein Resource (UniProt). *Nucleic Acids Res*:D193  
487 - 197.
- 488 Warren, W. C., D. F. Clayton, H. Ellegren, A. P. Arnold, L. W. Hillier, A. Kunstner, S.  
489 Searle, S. White, A. J. Vilella, S. Fairley, A. Heger, L. Kong, C. P. Ponting, E. D.  
490 Jarvis, C. V. Mello, P. Minx, P. Lovell, T. A. Velho, M. Ferris, C. N. Balakrishnan,  
491 S. Sinha, C. Blatti, S. E. London, Y. Li, Y. C. Lin, J. George, J. Sweedler, B.  
492 Southey, P. Gunaratne, M. Watson, K. Nam, N. Backstrom, L. Smeds, B.  
493 Nabholz, Y. Itoh, O. Whitney, A. R. Pfenning, J. Howard, M. Volker, B. M.  
494 Skinner, D. K. Griffin, L. Ye, W. M. McLaren, P. Flicek, V. Quesada, G. Velasco, C.  
495 Lopez-Otin, X. S. Puente, T. Olender, D. Lancet, A. F. Smit, R. Hubley, M. K.  
496 Konkel, J. A. Walker, M. A. Batzer, W. Gu, D. D. Pollock, L. Chen, Z. Cheng, E. E.  
497 Eichler, J. Stapley, J. Slate, R. Ekblom, T. Birkhead, T. Burke, D. Burt, C. Scharff,  
498 I. Adam, H. Richard, M. Sultan, A. Soldatov, H. Lehrach, S. V. Edwards, S. P.  
499 Yang, X. Li, T. Graves, L. Fulton, J. Nelson, A. Chinwalla, S. Hou, E. R. Mardis,  
500 and R. K. Wilson. 2010. The genome of a songbird. *Nature* 464:757-762.
- 501 Yokouchi, Y., M. Yamamoto, T. Toyota, H. Sasaki, and A. Kuroiwa. 1993. Regulatory  
502 interaction of positional signalings on coordinate expression of homeobox

503 genes in developing limb buds. *Limb Development and Regeneration*. Wiley-  
504 Liss, Inc.  
505 Zhang, G., B. Li, C. Li, M. T. Gilbert, E. D. Jarvis, J. Wang, and C. Avian Genome. 2014a.  
506 Comparative genomic data of the Avian Phylogenomics Project. *Gigascience*  
507 3:26.  
508 Zhang, G., C. Li, Q. Li, B. Li, D. M. Larkin, C. Lee, J. F. Storz, A. Antunes, M. J. Greenwold,  
509 R. W. Meredith, A. Odeen, J. Cui, Q. Zhou, L. Xu, H. Pan, Z. Wang, L. Jin, P.  
510 Zhang, H. Hu, W. Yang, J. Hu, J. Xiao, Z. Yang, Y. Liu, Q. Xie, H. Yu, J. Lian, P.  
511 Wen, F. Zhang, H. Li, Y. Zeng, Z. Xiong, S. Liu, L. Zhou, Z. Huang, N. An, J. Wang,  
512 Q. Zheng, Y. Xiong, G. Wang, B. Wang, J. Wang, Y. Fan, R. R. da Fonseca, A.  
513 Alfaro-Nunez, M. Schubert, L. Orlando, T. Mourier, J. T. Howard, G. Ganapathy,  
514 A. Pfenning, O. Whitney, M. V. Rivas, E. Hara, J. Smith, M. Farre, J. Narayan, G.  
515 Slavov, M. N. Romanov, R. Borges, J. P. Machado, I. Khan, M. S. Springer, J.  
516 Gatesy, F. G. Hoffmann, J. C. Opazo, O. Hastad, R. H. Sawyer, H. Kim, K. W. Kim,  
517 H. J. Kim, S. Cho, N. Li, Y. Huang, M. W. Bruford, X. Zhan, A. Dixon, M. F.  
518 Bertelsen, E. Derryberry, W. Warren, R. K. Wilson, S. Li, D. A. Ray, R. E. Green,  
519 S. J. O'Brien, D. Griffin, W. E. Johnson, D. Haussler, O. A. Ryder, E. Willerslev, G.  
520 R. Graves, P. Alstrom, J. Fjeldsa, D. P. Mindell, S. V. Edwards, E. L. Braun, C.  
521 Rahbek, D. W. Burt, P. Houde, Y. Zhang, H. Yang, J. Wang, E. D. Jarvis, M. T.  
522 Gilbert and J. Wang. 2014b. Comparative genomics reveals insights into avian  
523 genome evolution and adaptation. *Science* 346:1311-1320.  
524

525

## FIGURES

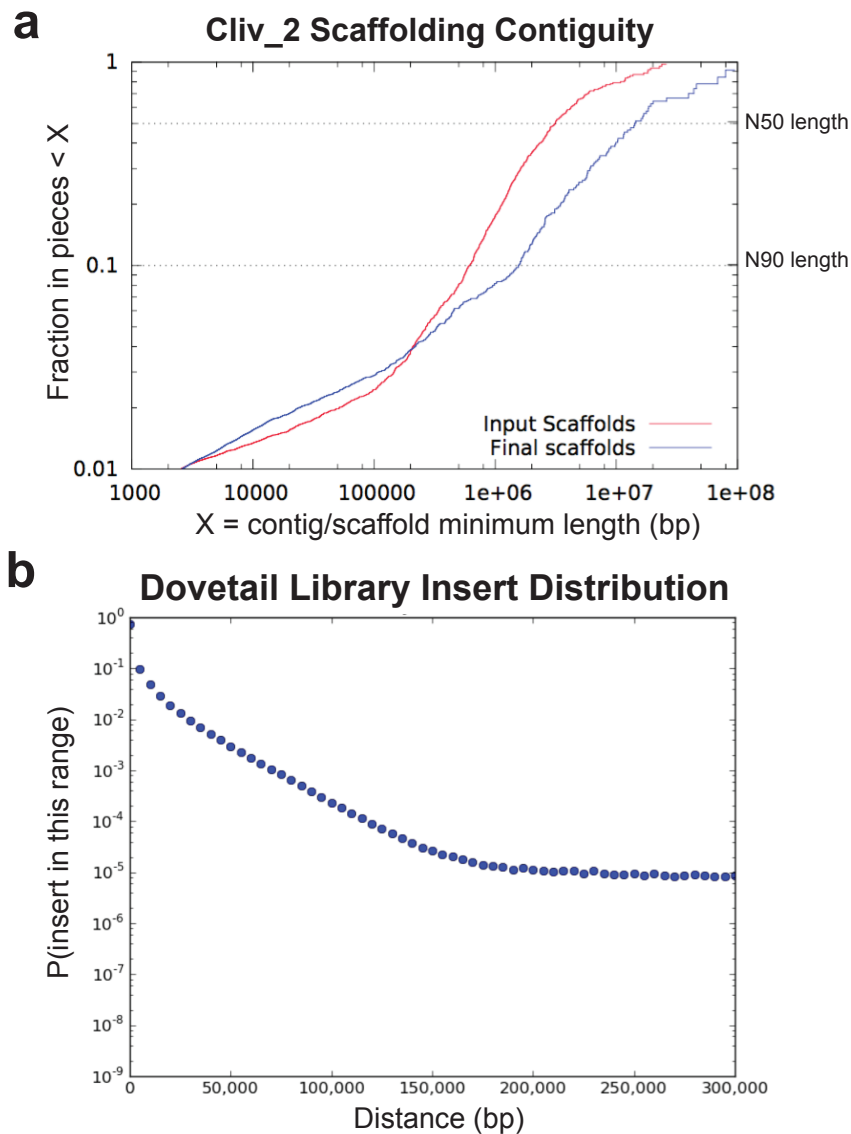

526

527 **Figure 1.** Assembly scaffolding contiguity and scaffolding library insert size

528 distributions. (a) Scaffolding comparison between Cliv\_1.0 (input scaffolds) and Cliv\_2.1

529 (final scaffolds) assemblies. (b) Distribution of Dovetail Genomics “Chicago” library

530 inserts.

531

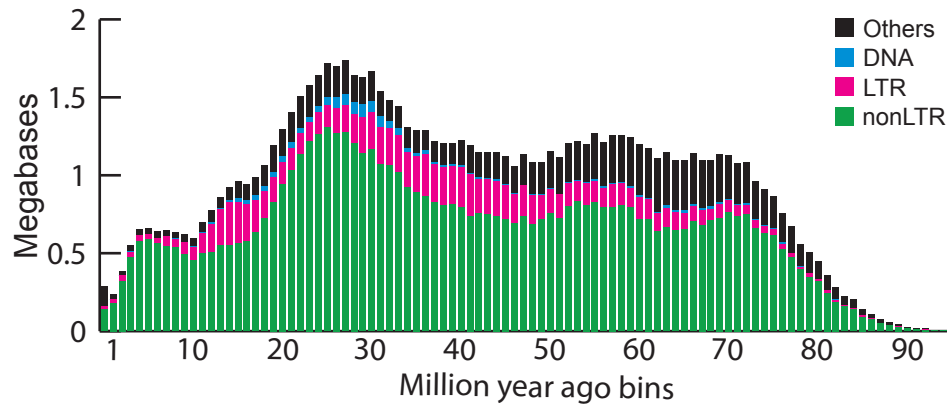

532

533 **Figure 2.** Temporal landscape of transposable elements. The amounts of DNA of each  
534 TE class were split into bins of 1 My, shown on the x axis (see Methods). We note that  
535 the lower detection of older elements (right of the graph) comes from a combination of  
536 lack of detection and TE removal, and that the amount of DNA corresponding to recent  
537 elements may be underestimated (recent copies are often collapsed in assemblies). The  
538 "Others" category primarily includes unclassified repeats.

539

540

541

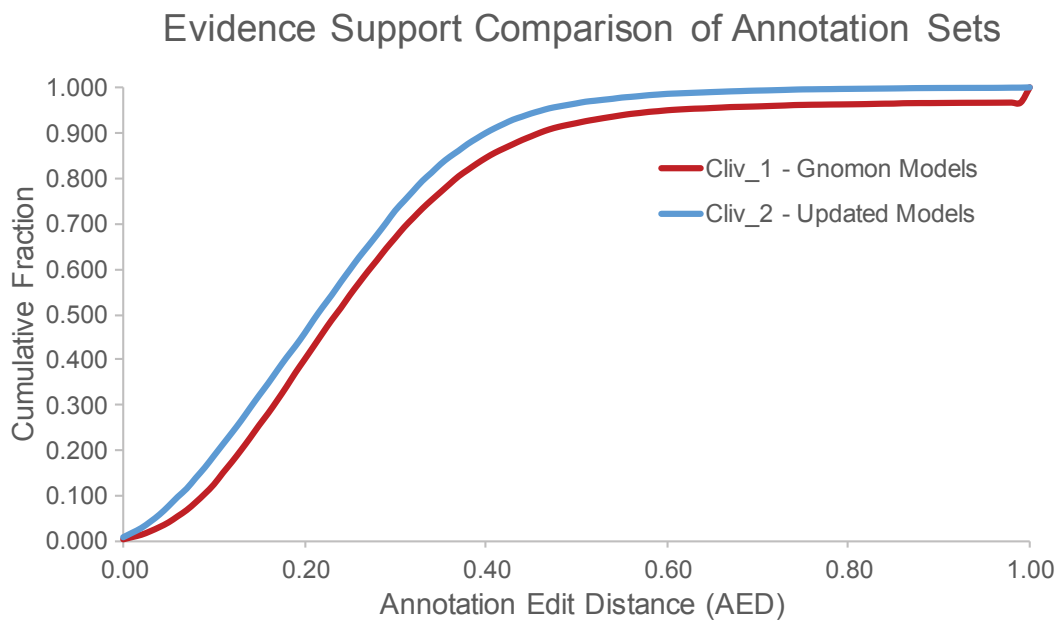

542

543

544 **Figure 3.** Evidence support comparison of annotation sets. Annotation edit distance  
545 (AED) support for gene models in Cliv\_2.1 (blue line) is improved over Cliv\_1.0 (NCBI  
546 Gnomon annotation, red line).

547



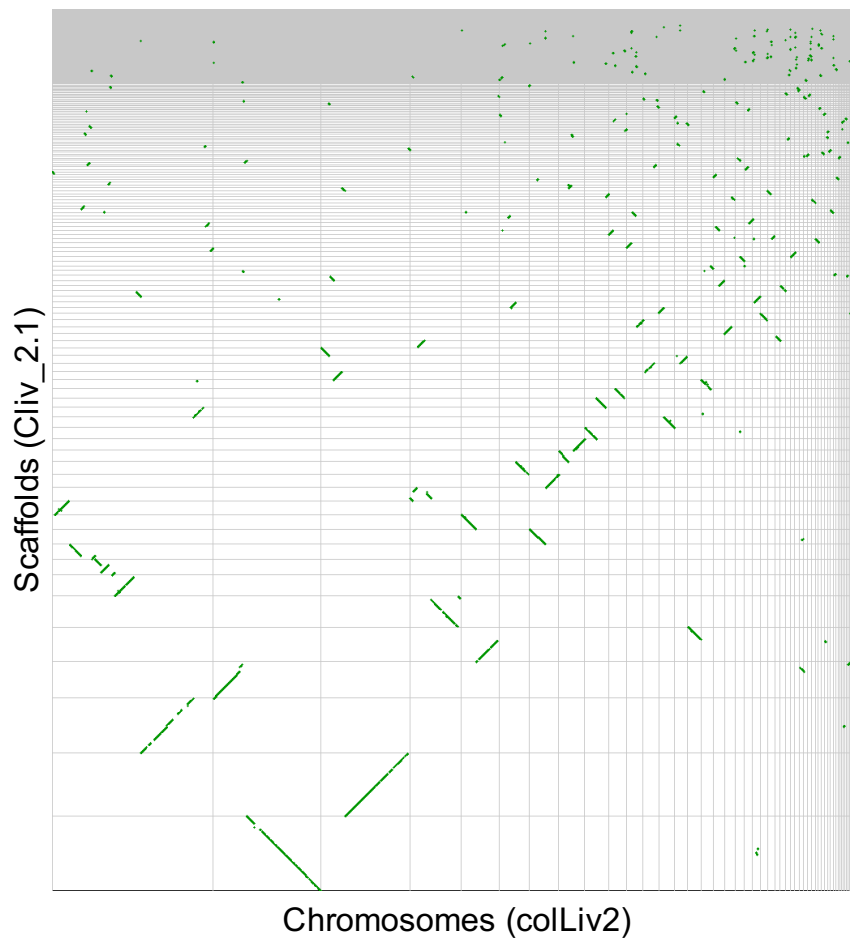

548

549

550 **Figure 4.** Dot plot of syntenic regions between the Cliv\_2.1 and colLiv2 assemblies of  
551 the *C. livia* genome. Each segment of the X axis represents a single colLiv2 scaffold  
552 ordered from largest (left) to smallest (right), while each segment of the Y axis represents  
553 a scaffold of the Cliv\_2.1 assembly, ordered from largest (bottom) to smallest (top).  
554 Green dots indicate aligned regions of synteny.

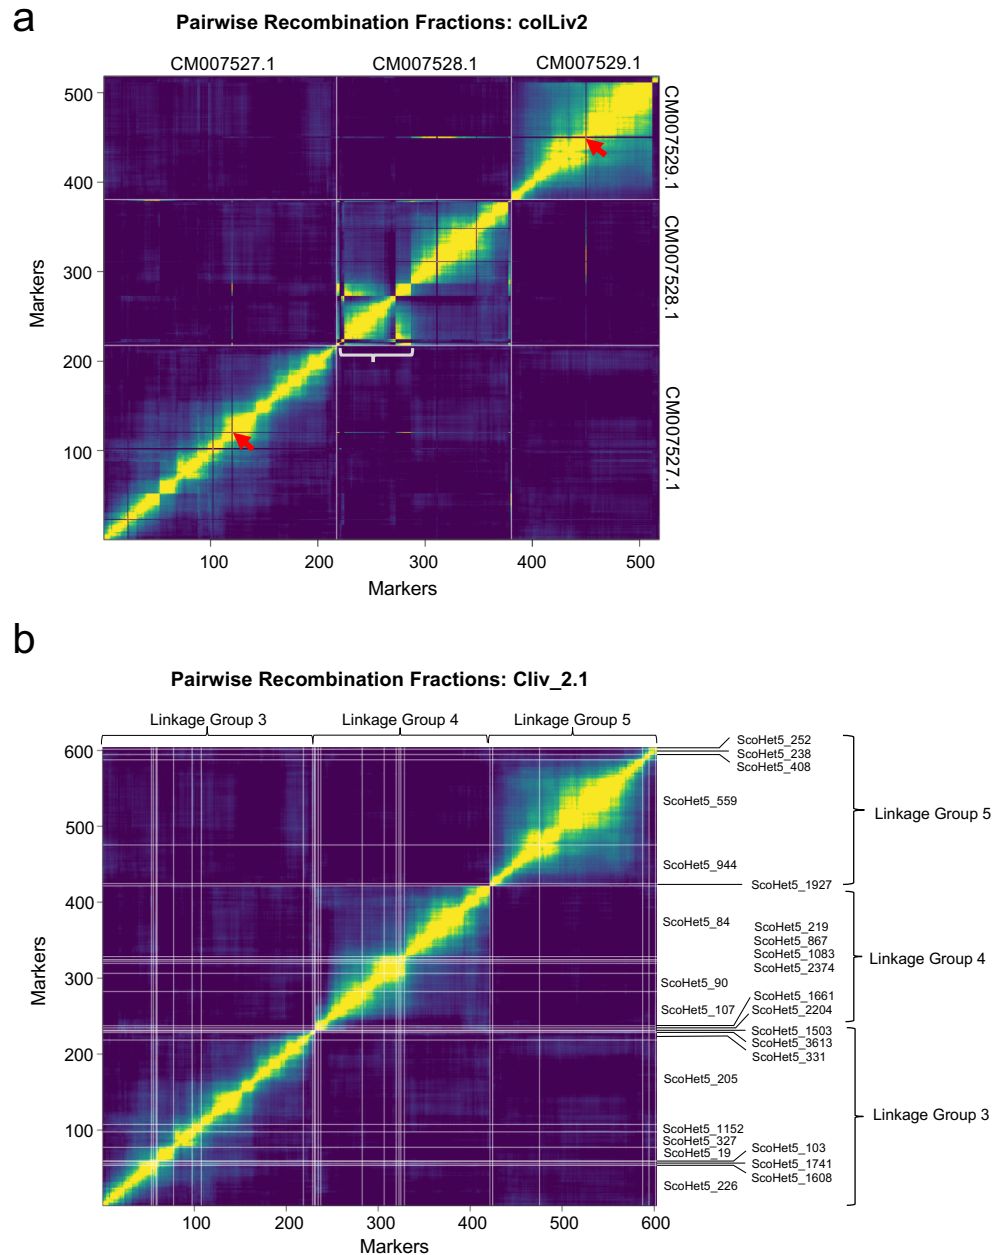

555

556 **Figure 5. Correspondence between genotyping data and marker order in colLiv2**  
 557 **and Cliv\_2.1 assemblies.** (a) Representative plot of pairwise recombination fractions for  
 558 GBS markers, ordered based on best alignment to colLiv2 assembly, for chromosomes  
 559 CM007527.1, CM007528.1, and CM007529.1. X and Y axes show individual markers,  
 560 ordered as they map to the colLiv2 chromosomes CM007527.1, CM007528.1, and  
 561 CM007529.1. White lines mark the boundaries between chromosomes. Yellow indicates

562 low pairwise recombination fraction (linked markers), while purple indicates high  
563 pairwise recombination fraction (unlinked markers). Red arrows highlight two markers,  
564 one mapped to chromosome CM007527.1 and one mapped to CM007529.1, for which  
565 recombination fractions suggest that these markers should instead be located on  
566 chromosome CM007528.1. A white bracket indicates a region on chromosome  
567 CM007528.1 where portions of the chromosome appear to be assembled in the wrong  
568 order. (b) Plot of pairwise recombination fractions for the Cliv\_2.1 scaffolds that make  
569 up linkage groups 3, 4, and 5. In (a), colLiv2 CM007527.1 largely corresponds to linkage  
570 group 3, CM007528.1 to linkage group 4, and CM007529.1 to linkage group 5. White  
571 lines mark the boundaries between individual scaffolds, with scaffold IDs indicated on  
572 the right side.

573

## TABLES

574

**Table 1. Assembly statistics for Cliv\_2.1**

---

|                             |                  |
|-----------------------------|------------------|
| Estimated Physical Coverage | 389.7x           |
| Total Length                | 1,108,534,737 bp |
| Total scaffolds             | 15,057           |
| Total scaffolds >1kb        | 4,062            |
| Total scaffolds >10kb       | 848              |

---

575

576

**Table 2. Assembly version comparison**

---

|                       | Cliv_1.0                   | Cliv_2.1                  |
|-----------------------|----------------------------|---------------------------|
| Total Length          | 1110.8 Mb                  | 1110.9 Mb                 |
| N50 Length            | 3.15 Mb and 82 scaffolds   | 14.3 Mb and 17 scaffolds  |
| N90 Length            | 0.618 Mb and 394 scaffolds | 1.56 Mb and 113 scaffolds |
| Completeness Estimate | 72.3-86.4%                 | 72.9-86.2%                |

---

577

578

579

580 **Table 3. Transcriptome assembly summary**

| SRA accession | Tissue               | Breed          | # assembled transcripts |
|---------------|----------------------|----------------|-------------------------|
| SRR521357     | Heart                | Danish tumbler | 79473                   |
| SRR521358     | Liver                | Danish tumbler | 35691                   |
| SRR521359     | Heart                | Oriental frill | 71078                   |
| SRR521360     | Liver                | Oriental frill | 74180                   |
| SRR521361     | Heart                | racing homer   | 80034                   |
| SRR521362     | Liver                | racing homer   | 80642                   |
| SRR5878849    | Embryo               | racing homer   | 208682                  |
| SRR5878850    | Embryo               | parlor roller  | 344735                  |
| SRR5878851    | Spleen               | racing homer   | 156415                  |
| SRR5878852    | Olfactory epithelium | racing homer   | 112632                  |
| SRR5878853    | Subepidermis         | racing homer   | 185484                  |
| SRR5878854    | Cochlear duct        | racing homer   | 189438                  |
| SRR5878855    | Brain                | racing homer   | 131999                  |
| SRR5878856    | Retina               | racing homer   | 186060                  |

581

582

583

584

**Table 4. Annotation statistics for Cliv\_2.1**

|                    | Genes  | Transcripts |
|--------------------|--------|-------------|
| Total              | 15,392 | 18,966      |
| match <sup>a</sup> | 14,898 | 18,472      |
| new                | 494    | 494         |

<sup>a</sup> Count that match Cliv\_1.0 annotations with a value of at least 90% (match is calculated as % identity multiplied by % end-to-end coverage)

585

**Table 5. Annotation version comparison**

|                   | Cliv_1.0 | Cliv_2.1 |
|-------------------|----------|----------|
| Total Gene Models | 15,724   | 15,392   |
| <i>coding</i>     | 15,022   | 14,683   |
| <i>non-coding</i> | 702      | 709      |
| Total Transcripts | 19,585   | 18,966   |
| <i>coding</i>     | 18,569   | 18,148   |
| <i>non-coding</i> | 1016     | 818      |

586

587

588 **Table 6. Summary of Cliv\_2.1 alignment to colLiv2 chromosome-level scaffolds.** Overall,  
 589 colLiv2 appears to exclude 1,184, or approximately 7.7%, of the 15,392 annotated genes from the  
 590 Cliv\_2.1 assembly; this is consistent with the overall decrease in genome size.  
 591

| Cliv_2.1 scaffold representation |        | # of scaffolds | Scaffold length range | Scaffolds with # of genes |        | Genes in LAST alignment to colLiv2 | Genes missing from LAST alignment to colLiv2 |
|----------------------------------|--------|----------------|-----------------------|---------------------------|--------|------------------------------------|----------------------------------------------|
| Missing                          | 14,189 | 200-393,647    | 147                   | 164                       | NA     | 164                                |                                              |
| ≤50% aligned                     | 251    | 318-2,545,801  | 183                   | 506                       | 369    | 137                                |                                              |
| 50-75% aligned                   | 183    | 581-5,717,624  | 251                   | 638                       | 550    | 88                                 |                                              |
| ≥75% aligned                     | 434    | 259-94,473,889 | 434                   | 14,084                    | 13,289 | 795                                |                                              |

592

593

594

## SUPPLEMENTAL TABLES

595

596 **Table S1. Positions of Cliv\_1.0 scaffolds in the Cliv\_2.1 scaffolds.** The table has the  
597 following format: column 1, Cliv\_2.1 scaffold name; column 2, Cliv\_1.0 sequence name; column  
598 3, starting base (zero-based) of the Cliv\_1.0 sequence; column 4, ending base of the Cliv\_1.0  
599 sequence; column 5, orientation of the Cliv\_1.0 sequence in the Cliv\_2.1 scaffold, where (-)  
600 indicates that the Cliv\_2.1 scaffold sequence is reverse complemented relative to the Cliv\_1.0  
601 assembly; column 6, starting base (zero-based) in the Cliv\_2.1 scaffold; column 7, ending base in  
602 the Cliv\_2.1 scaffold.

603

604 **Table S2. Positions of breaks made in the Cliv\_1.0 assembly to create the Cliv\_2.1**  
605 **assembly.** Data fields follow the same format that is used in Supplemental Table 1.

606

607 **Table S3. Summary of transposable element fragments, parsed into 1 My bins based on**  
608 **substitution rate**

609

610 **Table S4. Summary information of repeat masking, by class and by family**

611

612 **Table S5. Transcript count and cumulative distribution function (CDF) binned by**  
613 **Annotation Edit Distance (AED) values.** AED is a modified sensitivity/specificity metric used to  
614 compare annotation datasets to each other or to aligned transcriptome and protein homology  
615 datasets. For calculating AED, sensitivity is defined as the fraction of a given reference  
616 overlapping a prediction and measures false negative rates. For our purposes, the prediction is a  
617 transcript model and the reference (or truth set) is a set of aligned transcriptome and protein  
618 homology evidence. We calculate sensitivity using the formula  $SN = |p \cap r| / |r|$ ; where  $|p \cap r|$   
619 represents the number overlapping nucleotides between the prediction and reference, and  $|r|$   
620 represents the total number of nucleotides in the reference. Specificity is then defined as the  
621 fraction of a prediction overlapping a given reference, and it measures false positive rates. We



622 calculate specificity using the formula  $SP = |\rho \cap r|/|p|$ . We then define concordance to be the  
623 average of sensitivity and specificity ( $C = (SN+SP)/2$ ), and AED is 1 minus the concordance ( $AED$   
624  $= 1 - C$ ). Transcript models that have high AED values then show little concordance to aligned  
625 experimental evidence, and models with low AED values show high concordance.

626

627 **Table S6. Linkage map assembled from genotype-by-sequencing markers aligned to the**  
628 **Cliv\_2.1 assembly, and positions of aligned markers within the Cliv\_2.1, Cliv\_1.0, and**  
629 **colLiv2 assemblies.**

630

631 **Table S7. Summary of GBS markers for which best BLAST alignment to colLiv2 is**  
632 **discordant with linkage data.** Columns describe marker position in the linkage map, the best  
633 BLAST hit within the colLiv2 assembly, and the marker position in the Cliv\_2.1 assembly. For  
634 each marker, the colLiv2 chromosome to which the marker appears to be linked is also indicated.
